# Supplementary material for: Screening for Hyperthermophilic Electrotrophs for the Microbial Electrosynthesis of Organic Compounds
Source: MDPI journal article supplement (doi:10.3390/microorganisms10112249), 2022-11-14
Supplement: s1 [file s1]

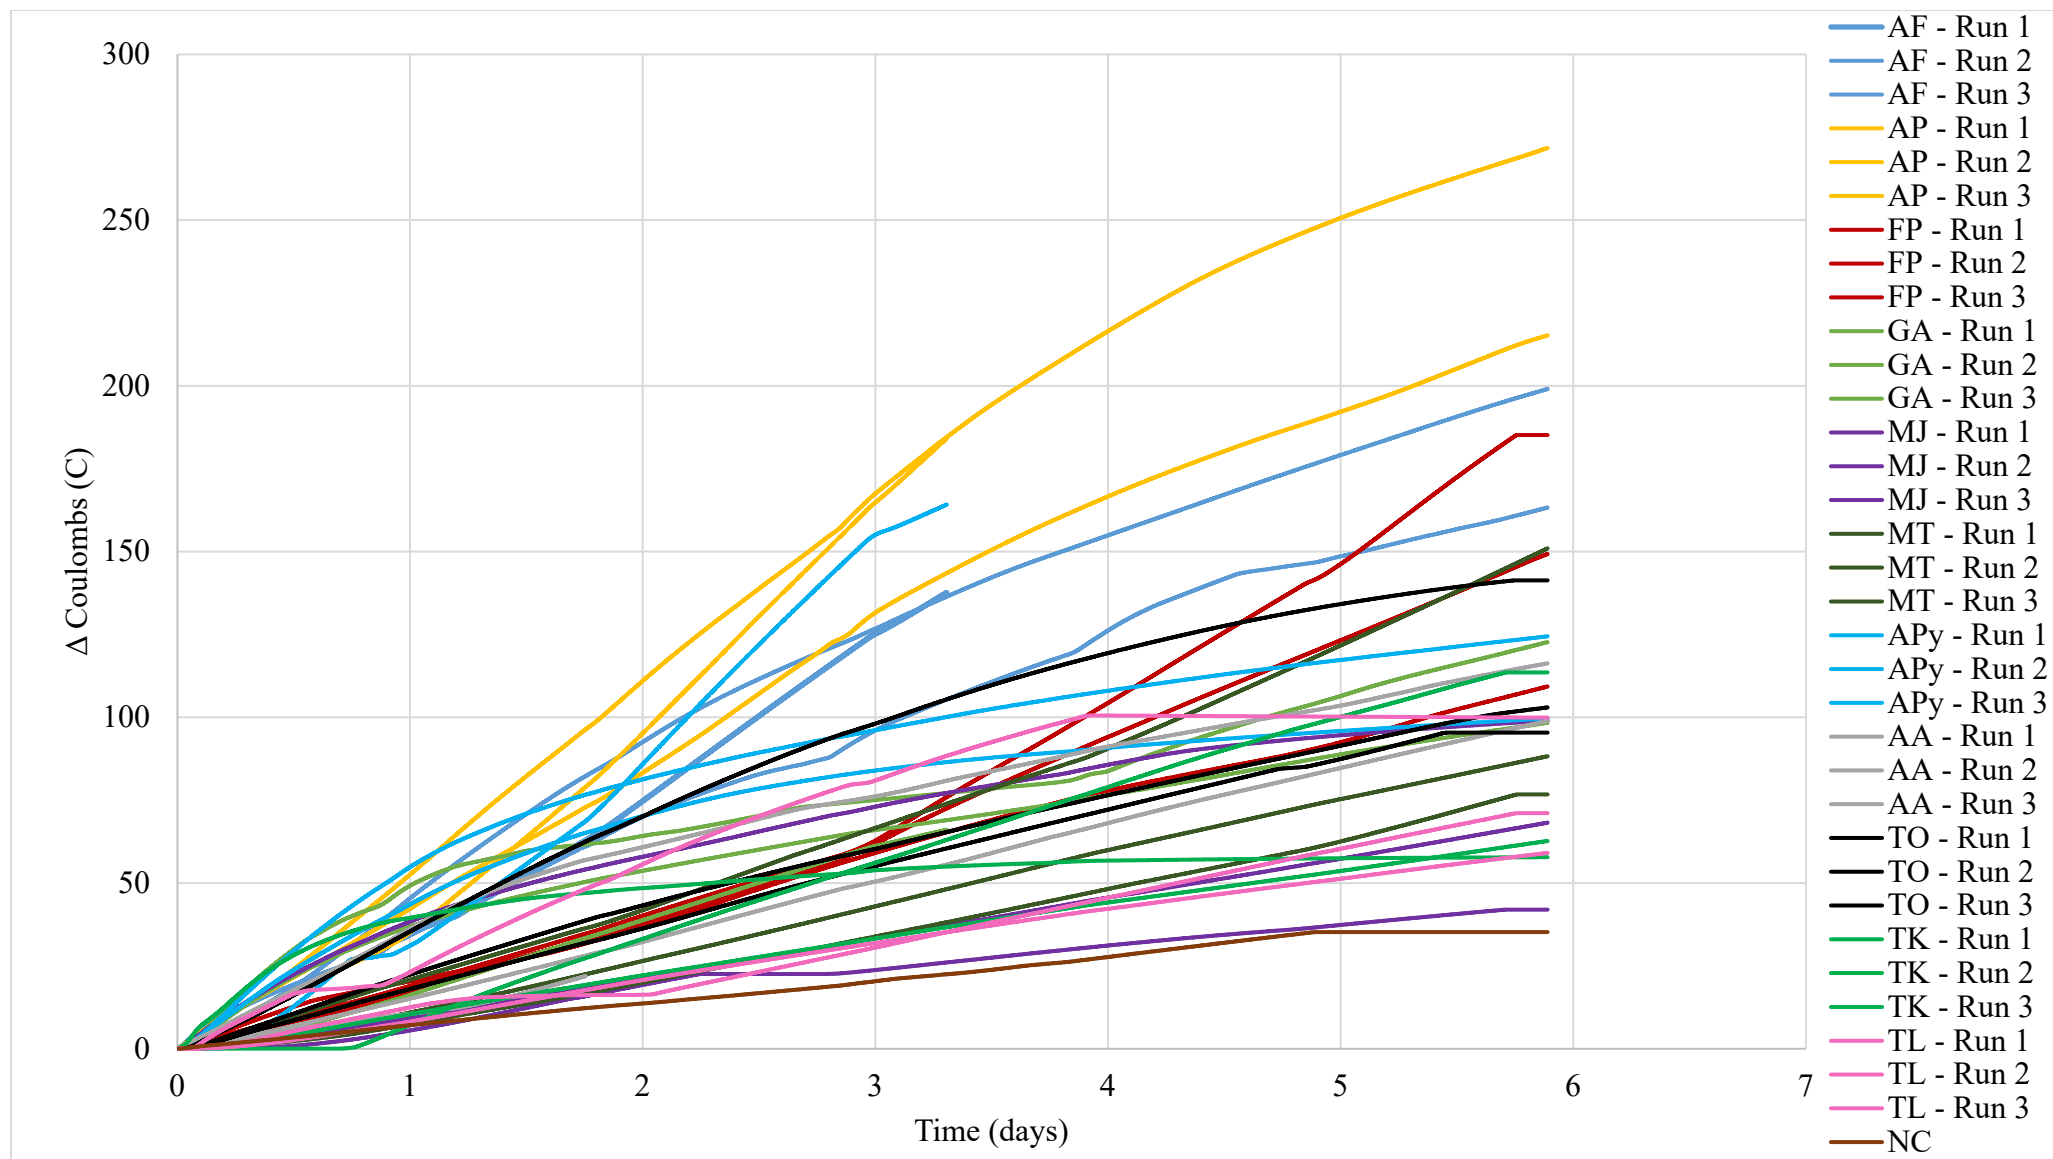

**Figure S1.** Coulombs consumed over time during the triplicates of the screening of the 11 (hyper)thermophilic strains. Data are missing from day 3.3 on the first run of AF, AP, GA, Apy, and AA due to technical problems and were extrapolated for further analysis. AF: *Archaeoglobus fulgidus*; AP: *Archaeoglobus profundus*; FP: *Ferroplasma acidophilum*; GA: *Geoglobus ahangari*; MJ: *Methanocaldococcus jannaschii*; MT: *Methanococcus thermolithotrophicus*; APy: *Aquifex pyrophilus*; AA: *Aquifex aeolicus*; TO: *Thermococcus onnurineus*; TK: *Thermococcus kodakarensis*; TL: *Thermococcus litoralis*. NC: negative control with mix of electron acceptor used.

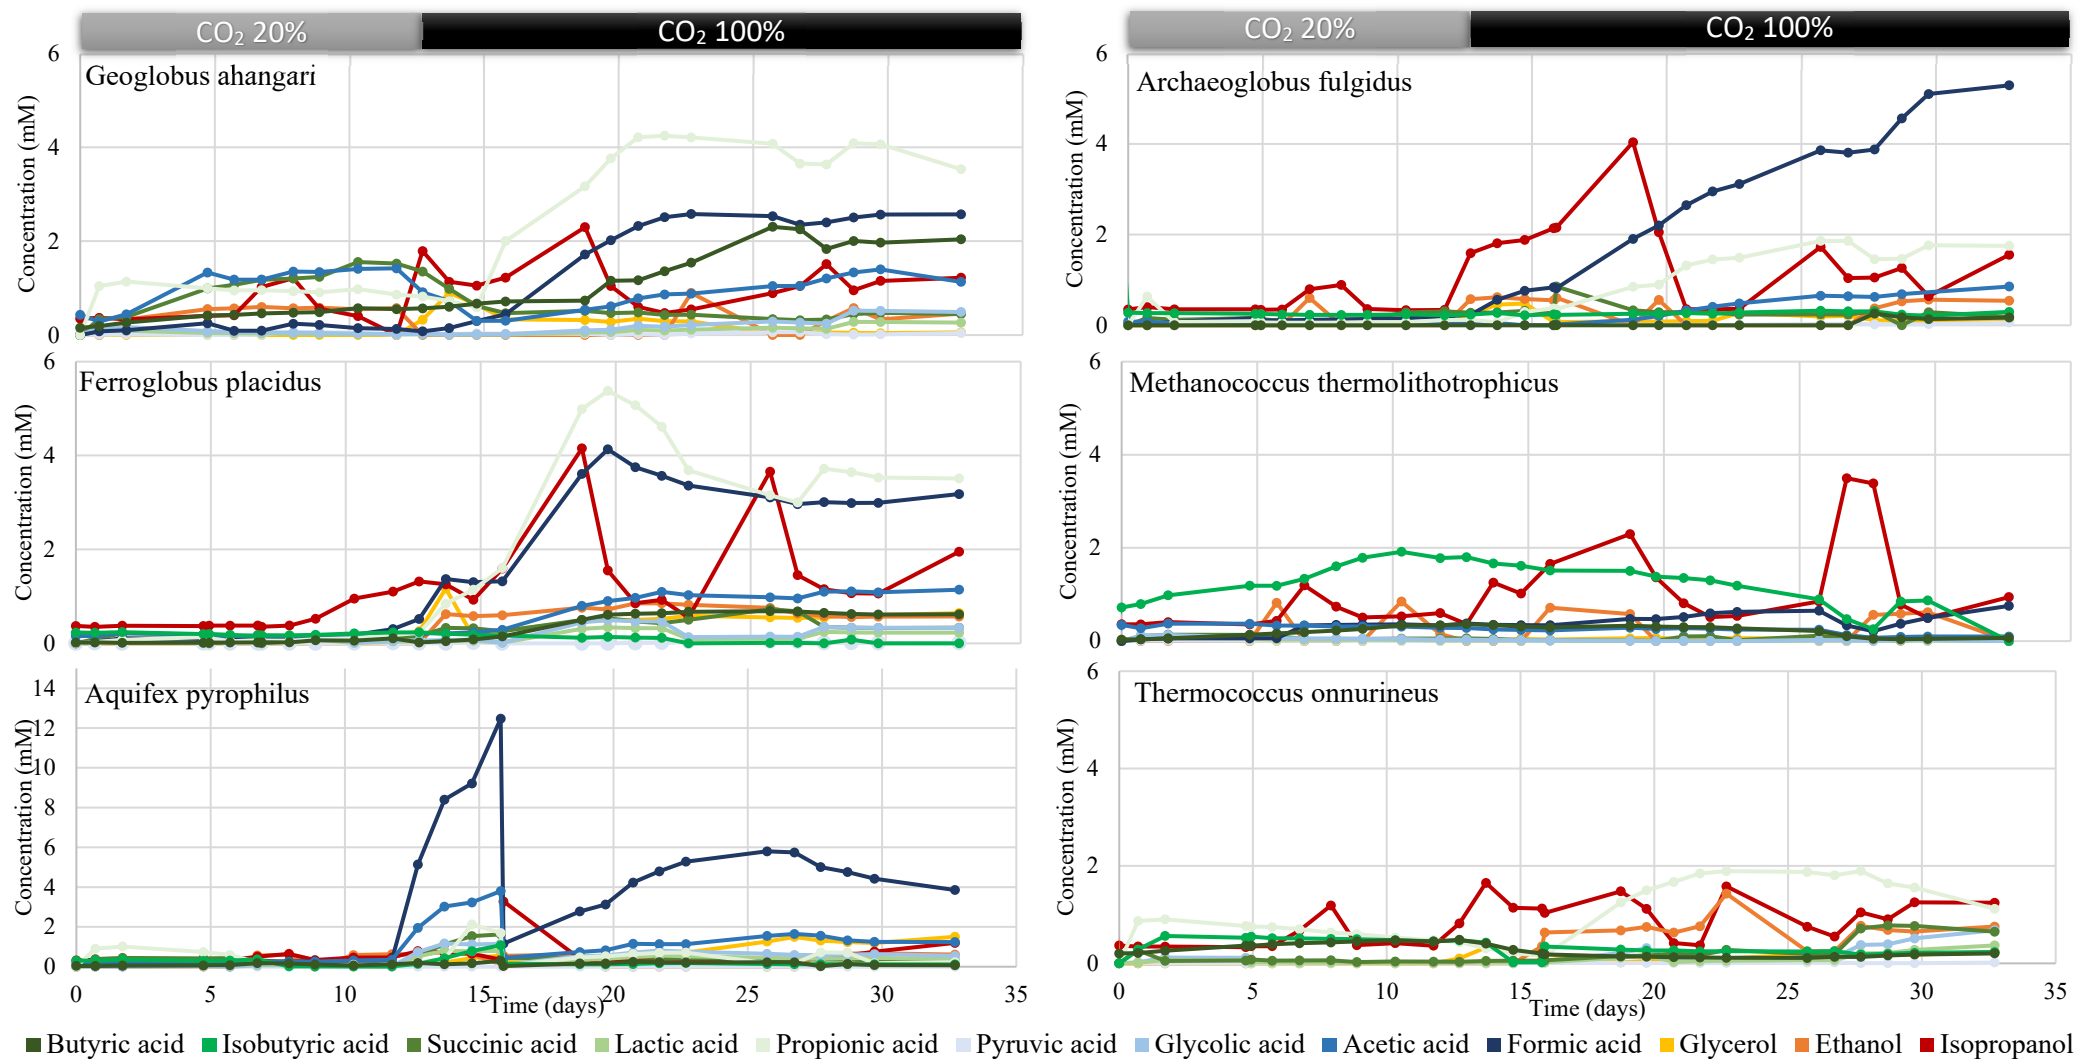

**Figure S2.** Production of organics in mM during long-term experiments over time. Lactic acid and succinic acid concentrations were ignored for strains supplied with thiosulfate as electron acceptor, as these compounds peak at the same time during HPLC. CO<sub>2</sub> was increased from 20% to 100% on day 13. In *Aquifex pyrophilus*, the media was renewed on day 16 due to high pH.

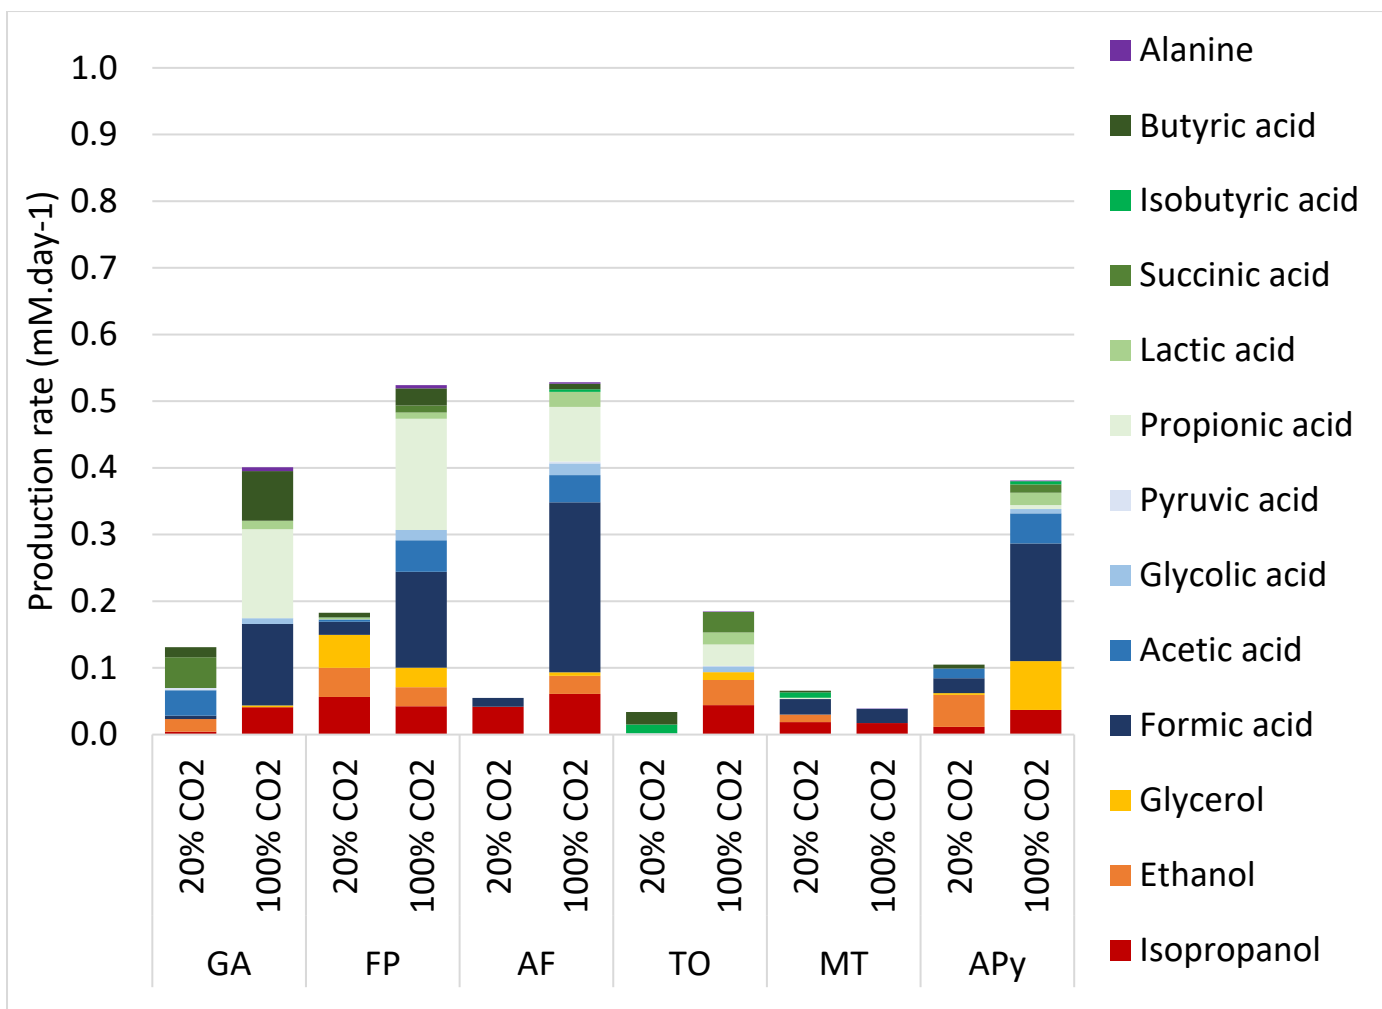

**Figure S3.** Organic production per day measured by HPLC, NMR, and GC-MS during the 33 days of experiment with the 6 selected strains. This graph show that the increase in organic production is not related to longer cultivation period at 100% CO<sub>2</sub> than at 20% CO<sub>2</sub>.

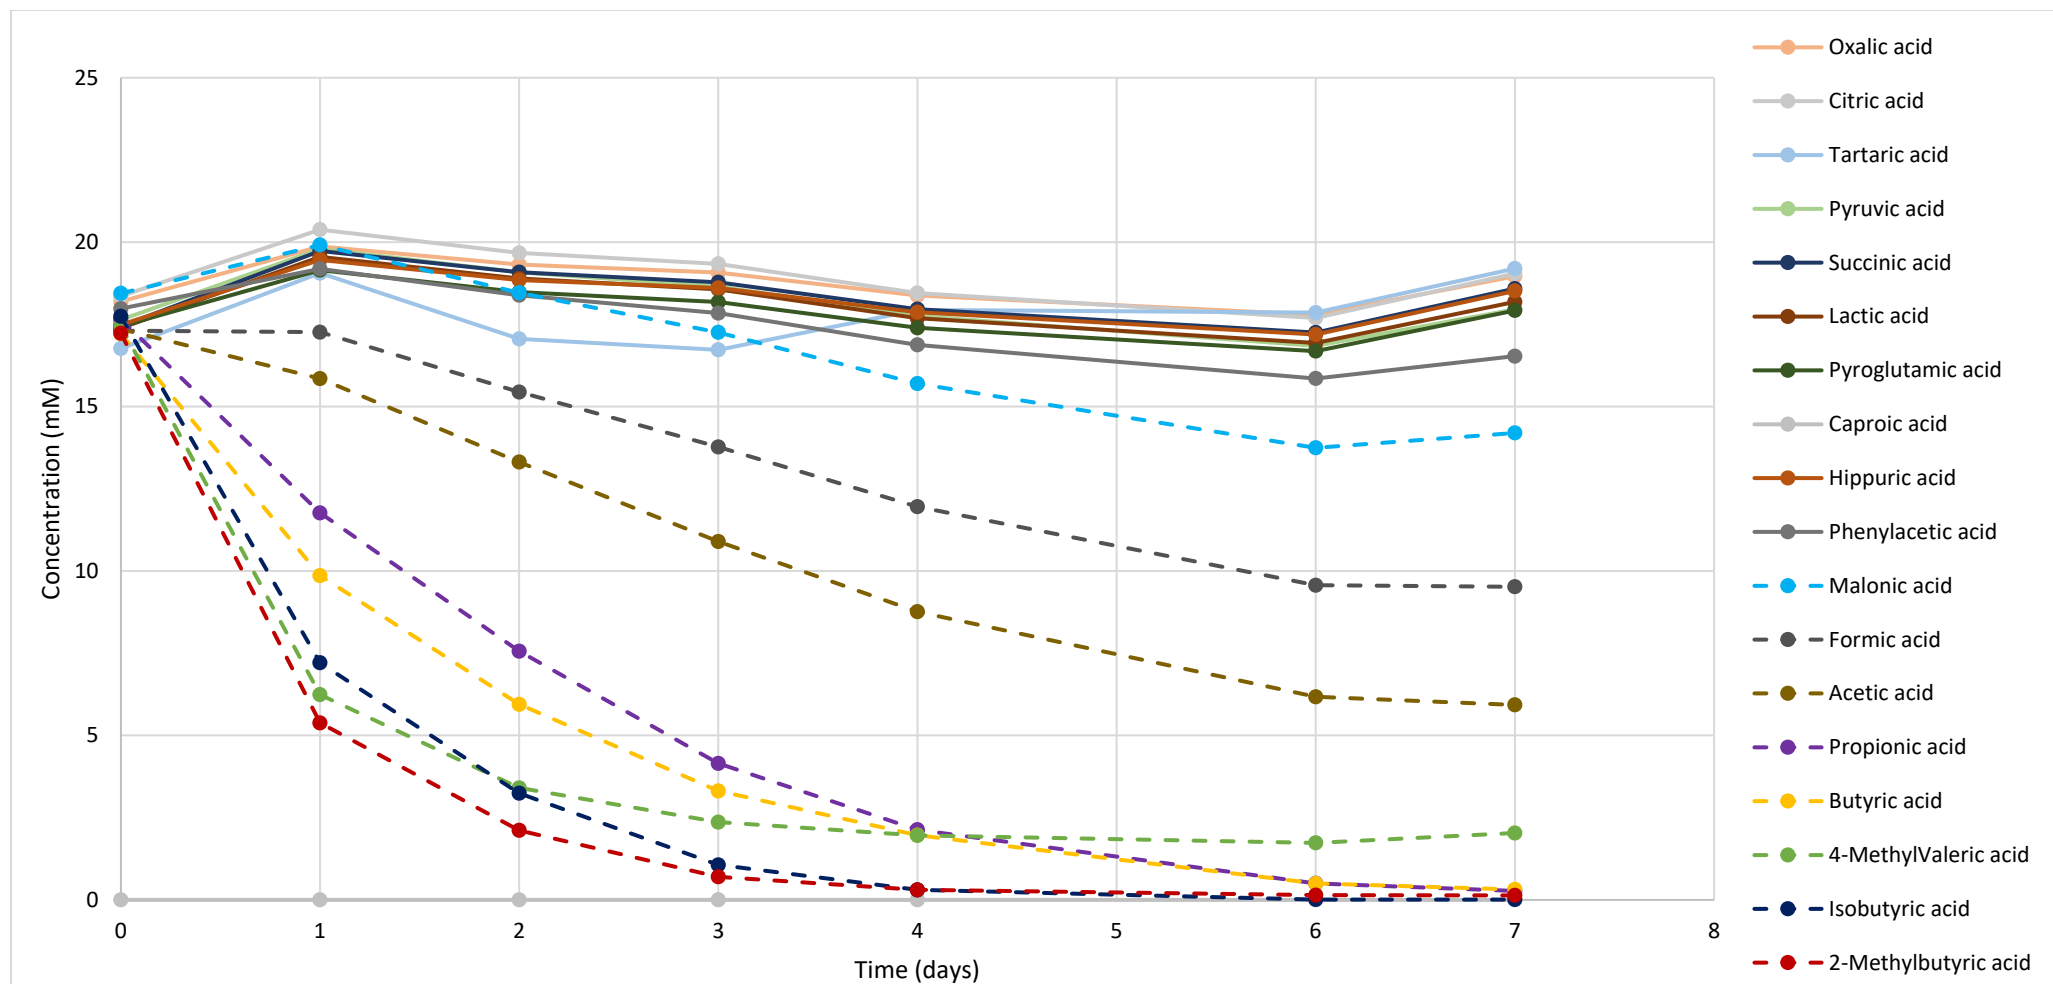

**Figure S4.** Evaluation of evaporation rates of organic acids in the H-cells over time. The evaluation of evaporation or thermal degradation of organic acids was determined in a non-polarized control in the exact same conditions as the biotic experiments with a mix of each organic acid at 20mM initial concentration and measured each day by HPLC method.

**Table S1.** Correspondence between codes and enzymes in Figure 5. The presence of gene was assessed from the literature ([21,29]), on the KEGG Database for each strain, or for closest relative strains when not available. X: gene or function not retrieved in the literature. MT\*: data from *Methanococcus maripaludis*. Apy\*: data from *Aquifex aeolicus*.

| Code                                      | Enzyme                                   | GA  | FP  | AF  | TO  | MT* | Apy* |
|-------------------------------------------|------------------------------------------|-----|-----|-----|-----|-----|------|
| <b>Electron transfer mechanism</b>        |                                          |     |     |     |     |     |      |
| CYT                                       | Cytochrome                               | Yes | Yes | Yes | X   | X   | Yes  |
| HYD                                       | Hydrogenase                              | Yes | Yes | Yes | Yes | Yes | Yes  |
| <b>Reverse TCA cycle / TCA cycle</b>      |                                          |     |     |     |     |     |      |
| ACL                                       | ATP citrate lyase                        | Yes | Yes | Yes | X   | X   | Yes  |
| ANH                                       | Aconitate hydratase                      | X   | X   | X   | X   | X   | Yes  |
| CS                                        | Citrate lyase                            | Yes | Yes | Yes | X   | X   | Yes  |
| FH                                        | Fumarase                                 | Yes | Yes | Yes | X   | Yes | Yes  |
| IDH                                       | Isocitrate dehydrogenase                 | Yes | Yes | Yes | X   | Yes | Yes  |
| MDH                                       | malate dehydrogenase                     | Yes | Yes | Yes | X   | Yes | Yes  |
| OFO                                       | 2-oxoglutarate:ferredoxin oxidoreductase | Yes | Yes | Yes | Yes | Yes | Yes  |
| SCS                                       | Succinyl-CoA synthetase                  | Yes | Yes | Yes | Yes | Yes | Yes  |
| SDH                                       | Succinate dehydrogenase                  | Yes | Yes | Yes | X   | Yes | Yes  |
| <b>Reductive Acetyl-CoA pathway</b>       |                                          |     |     |     |     |     |      |
| ACS                                       | acetyl-CoA synthase                      | Yes | Yes | Yes | Yes | Yes | X    |
| CODH                                      | carbon monoxide dehydrogenase            | Yes | Yes | Yes | Yes | Yes | X    |
| FDH                                       | formate dehydrogenase                    | Yes | Yes | Yes | Yes | Yes | Yes  |
| FTS                                       | formyl-THF synthase                      | Yes | Yes | Yes | X   | Yes | X    |
| MTC                                       | methenyl-THF cyclohydrolase              | Yes | Yes | Yes | X   | Yes | Yes  |
| MTD                                       | methylene-THF dehydrogenase              | Yes | Yes | Yes | X   | Yes | Yes  |
| MTR                                       | methylene-THF reductase                  | Yes | Yes | Yes | X   | Yes | Yes  |
| <b>Electrofermentation</b>                |                                          |     |     |     |     |     |      |
| PFL                                       | pyruvate-formate lyase                   | X   | X   | X   | Yes | X   | X    |
| <b>Alanine synthesis</b>                  |                                          |     |     |     |     |     |      |
| AST                                       | alanine-synthesizing transaminase        | X   | X   | X   | Yes | X   | X    |
| <b>Glycerol synthesis</b>                 |                                          |     |     |     |     |     |      |
| ENL                                       | Enolase                                  | Yes | Yes | Yes | Yes | Yes | Yes  |
| GAPD                                      | phosphoglycerate kinase                  | Yes | Yes | Yes | Yes | Yes | Yes  |
| GDH                                       | glycerol dehydrogenase                   | X   | X   | X   | X   | X   | X    |
| GK                                        | glycerol kinase                          | X   | ?   | ?   | Yes | ?   | Yes  |
| PEPS                                      | phosphoenolpyruvate synthetases          | Yes | Yes | Yes | Yes | Yes | Yes  |
| PGM                                       | phosphoglycerate mutase                  | Yes | Yes | Yes | Yes | Yes | Yes  |
| TIM                                       | triosephosphate isomerase                | Yes | Yes | Yes | Yes | Yes | Yes  |
| <b>Butyrate and Isobutyrate synthesis</b> |                                          |     |     |     |     |     |      |
| ALDH                                      | aldehyde dehydrogenase                   | X   | X   | X   | X   | X   | X    |
| ALS                                       | acetolactate synthase                    | Yes | Yes | Yes | Yes | Yes | Yes  |
| ATO                                       | acetyl-CoA C-acetyltransferase           | Yes | Yes | Yes | Yes | Yes | X    |
| BCD                                       | butyryl-CoA dehydrogenase                | X   | X   | X   | X   | X   | X    |
| BUK                                       | butyrate kinase                          | X   | X   | X   | X   | X   | X    |
| CRT                                       | crotonase                                | Yes | Yes | Yes | X   | X   | X    |
| HBD                                       | hydroxybutyryl-CoA dehydrogenase         | Yes | Yes | Yes | X   | X   | X    |

|                              |                                        |     |     |     |     |     |     |
|------------------------------|----------------------------------------|-----|-----|-----|-----|-----|-----|
| ICM                          | isobutyryl-CoA mutase                  | Yes | Yes | Yes | X   | X   | X   |
| ILVC                         | ketol-acid reductoisomerase            | Yes | Yes | Yes | X   | Yes | Yes |
| ILVD                         | ketoisovalerate decarboxylase          | Yes | Yes | Yes | X   | Yes | Yes |
| KIVD                         | alpha-ketoisovalerate decarboxylase    | X   | X   | X   | X   | X   | X   |
| <b>Propionate synthesis</b>  |                                        |     |     |     |     |     |     |
| MCD                          | methylmalonyl-CoA decarboxylase        | X   | X   | X   | X   | X   | X   |
| MME                          | methylmalonyl-CoA epimerase            | Yes | Yes | Yes | Yes | X   | X   |
| MMM                          | methylmalonyl-CoA mutase               | Yes | Yes | Yes | Yes | X   | X   |
| <b>Acetate synthesis</b>     |                                        |     |     |     |     |     |     |
| ACK                          | acetate kinase                         | Yes | Yes | Yes | Yes | Yes | X   |
| PTA                          | phosphate acetyltransferase            | Yes | Yes | Yes | X   | Yes | X   |
| <b>Lactate synthesis</b>     |                                        |     |     |     |     |     |     |
| LDH                          | D-lactate dehydrogenase                | X   | X   | Yes | X   | X   | X   |
| <b>Isopropanol synthesis</b> |                                        |     |     |     |     |     |     |
| AACS                         | Acetoacetyl-CoA synthetase             | X   | X   | X   | X   | X   | X   |
| ADC                          | acetoacetate decarboxylase             | Yes | X   | Yes | X   | X   | X   |
| IDH                          | isopropanol dehydrogenase              | X   | X   | X   | X   | X   | X   |
| <b>Ethanol synthesis</b>     |                                        |     |     |     |     |     |     |
| ADHE                         | aldehyde-alcohol dehydrogenase         | X   | X   | X   | X   | Yes | Yes |
| <b>Pyruvate synthesis</b>    |                                        |     |     |     |     |     |     |
| PFOR                         | pyruvate ferredoxin oxidoreductase     | Yes | Yes | Yes | Yes | Yes | Yes |
| <b>Glycolate synthesis</b>   |                                        |     |     |     |     |     |     |
| ACEA                         | Isocitrate lyase                       | X   | X   | X   | X   | X   | X   |
| GHRA                         | Glyoxylate/hydroxypyruvate reductase A | X   | X   | X   | Yes | Yes | X   |
| <b>Respiration</b>           |                                        |     |     |     |     |     |     |
| ETC                          | Electron transfer Chain                | Yes | Yes | Yes | Yes | Yes | Yes |
| ATPS                         | ATP synthase                           | Yes | Yes | Yes | Yes | Yes | Yes |
| FeR                          | Iron reducing complex                  | Yes | Yes | X   | X   | X   | X   |
| DSR                          | Dissimilatory sulfite reductase        | Yes | Yes | Yes | Yes | X   | Yes |
| APR                          | Adenylyl-sulfate reductase             | Yes | Yes | Yes | Yes | X   | Yes |
| SAT                          | Sulfate adenylyltransferase            | Yes | Yes | Yes | Yes | X   | Yes |
| NOS                          | Nitrous oxide reductase                | Yes | Yes | X   | X   | X   | Yes |
| NOR                          | Nitric oxide reductase                 | Yes | Yes | X   | X   | X   | Yes |
| NIR                          | Nitrite reductase                      | Yes | Yes | X   | X   | X   | Yes |
| NAR                          | Nitrate reductase                      | Yes | Yes | X   | X   | X   | Yes |

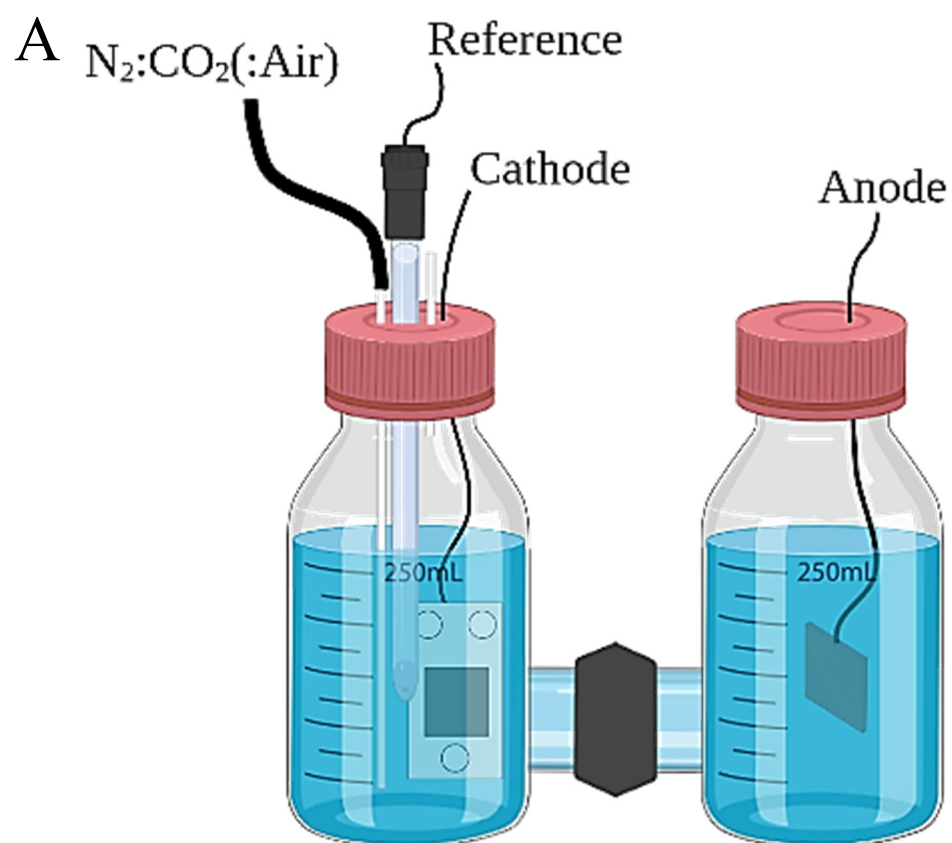

B

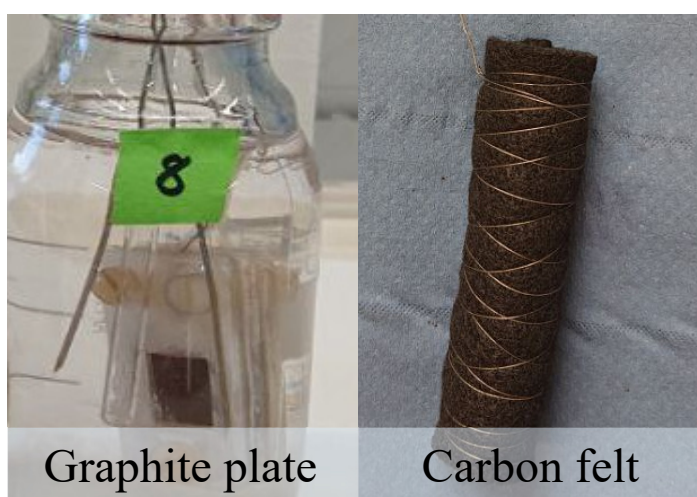

**Figure S5.** Schematic of the electrochemical system (A) and the 2 types of electrodes used in this study.
